# Supplementary material
Source: HighWire-hosted journal article supplement (https://www.annfammed.org/highwire/filestream/7387/field_highwire_adjunct_files/0/1_71phillipssuppTHIS_IS_IT.pdf)
Supplement: 1_71phillipssuppTHIS_IS_IT.pdf [file 1_71phillipssuppTHIS_IS_IT.pdf]

Online Supplementary Material

Phillips RL Jr, Fryer GE, Chen FM, et al. The Balanced Budget Act of 1997 and the financial health of teaching hospitals. *Ann Fam Med*. 2004;2:71-78.

<http://www.annfammed.org/cgi/content/full/2/1/71/DC1>

**Supplemental Appendix. Variables from Hospital Cost Reports and Formulas Used for Calculations**

| Variable Categories & Names                                     | Formulas & Variable Numbers                                                                                                                                                               |
|-----------------------------------------------------------------|-------------------------------------------------------------------------------------------------------------------------------------------------------------------------------------------|
| <b>Hospital characteristic</b>                                  |                                                                                                                                                                                           |
| Type of hospital                                                | F26                                                                                                                                                                                       |
| Classified as referral center                                   | F31                                                                                                                                                                                       |
| Medicare-dependent hospital                                     | F68                                                                                                                                                                                       |
| Total hospital beds                                             | F85                                                                                                                                                                                       |
| Type of hospital                                                | F25*                                                                                                                                                                                      |
| <b>Hospital financial reserve</b>                               | F2072 - (F2066 + F2089)                                                                                                                                                                   |
| Total facility assets                                           | F2072                                                                                                                                                                                     |
| Total facility fixed asset                                      | F2066                                                                                                                                                                                     |
| Total facility liabilities                                      | F2089                                                                                                                                                                                     |
| <b>PPS payments</b>                                             |                                                                                                                                                                                           |
| FPPSIPAY (total inpatient PPS)                                  | FPPSOPAY + FPPSCPAY                                                                                                                                                                       |
| FPPSOPAY (total payment for inpatient operating costs)          | PPS payment + IME + DSH + PPS outlier payments = F1825                                                                                                                                    |
| FPPSCPAY (inpatient program capital and exception payments)     | F1826 + F1827                                                                                                                                                                             |
| FOUTPPAY (total outpatient PPS)                                 | Part B payments and deductibles for ambulatory surgical centers + radiology + diagnostic procedures + hospital-based care = F1912 + F1915 + F1917 + F1920 + F1922 + F1925 + F1854 + F1855 |
| <b>PPS costs</b>                                                |                                                                                                                                                                                           |
| FPPSICOS (total inpatient costs)                                | FPPSOCOS + FPPSCCOS                                                                                                                                                                       |
| FPPSOCOS (total inpatient operating costs - pass through costs) | F953                                                                                                                                                                                      |
| FPPSCCOS (capital costs)                                        | (Part A inpatient capital costs - Subprovider and nursery capital costs) + Ancillary capital costs = (F1698 - F1695 - F1696 - F1697) + (F1708 - F1705 - F1706 - F1707) + (F1739 + F1770)  |
| FOUTCOS (total outpatient costs)                                | Part B deductibles and coinsurance + Costs of ambulatory surgical centers, radiology, diagnostic procedures, and hospital-based care = F1855 + F1856                                      |
| <b>PPS margin</b>                                               | [(FPPSIPAY + FOUTPPAY) - (FPPSICOS + FOUTCOS) - F1820] / (FPPSIPAY + FOUTPPAY - F1820)                                                                                                    |
| IME payments†                                                   | F1820                                                                                                                                                                                     |
| <b>GME payments</b>                                             |                                                                                                                                                                                           |
| Actual IME payments                                             | F1820                                                                                                                                                                                     |
| Actual Part A DME payment                                       | F1828                                                                                                                                                                                     |
| Actual Part B DME payments                                      | F1857                                                                                                                                                                                     |
| <b>GME costs</b>                                                |                                                                                                                                                                                           |
| Interns & residents – salary & fringes (approved program)       | F614                                                                                                                                                                                      |
| Interns & residents – program costs (approved program)          | F615                                                                                                                                                                                      |
| Paramedical education costs                                     | F616                                                                                                                                                                                      |
| <b>GME margin</b>                                               | [(F1820 + F1828 + F1857) - (F614 + F615 + F616)] / (F1820 + F1828 + F1857)                                                                                                                |
| <b>Bad debt payments</b>                                        | F2024A + F2005A + F1986A + F1966A + F1950A + F1933A + F1903A + F1882A + F1861A + F1838A                                                                                                   |
| <b>Bad debt costs‡</b>                                          | F2024 + F2005 + F1966 + F1950 + F1933 + F1903 + F1882 + F1861 + F1838 + F1986                                                                                                             |
| <b>Bad debt margin</b>                                          | (Bad debt payments - Bad debt costs) / Bad debt payments                                                                                                                                  |
| <b>Medicare margin</b>                                          | [(FPPSIPAY + FOUTPPAY + GME payments + Bad debt payments) - (FPPSICOS + FOUTCOS + GME costs + Bad debt costs)] / (FPPSIPAY + FOUTPPAY + GME payments + Bad debt payments)                 |

Continued

Online Supplementary Material

Phillips RL Jr, Fryer GE, Chen FM, et al. The Balanced Budget Act of 1997 and the financial health of teaching hospitals. *Ann Fam Med*. 2004;2:71-78.

<http://www.annfammed.org/cgi/content/full/2/1/71/DC1>

|                                                        |                                                  |
|--------------------------------------------------------|--------------------------------------------------|
| <b>Net revenue</b>                                     | $FTOTREV - FTOTHEXP = F2146$                     |
| FTOTREV (total revenue)                                | F2144                                            |
| FTOTHEXP (total costs)                                 | $F2138 + F2145$                                  |
| <b>Total margin<sup>§</sup></b>                        | $(FTOTREV - FTOTHEXP) / FTOTREV = F2146 / F2144$ |
| <b>Managed Medicare (Medicare+Choice) GME payments</b> | F2037N                                           |
| <b>Resident FTE variables</b>                          |                                                  |
| Primary care FTE 1996 & 1998                           | F2033                                            |
| Primary care FTE 1999                                  | F2037B1                                          |
| Nonprimary care FTE 1996 & 1998                        | F2034                                            |
| Nonprimary care FTE 1999                               | F2037B2                                          |

PPS = prospective payment system; IME = indirect medical education; DSH = disproportionate share; GME = graduate medical education; DME = direct medical education; FTE = full-time-equivalent.

\*F25 categories: 1 or 2 = nonprofit; 3 – 5 = proprietary/for-profit; 6 – 13 = government (federal, state, county, other).

†We removed IME from PPS margin since it is an added payment for indirect education-related cost, it is part of FPPSIPAY, and education costs are not included in FPPISCOS or FOUTCOS.

‡Bad debt was reimbursed at 100% for cost-reporting periods beginning on or after October 1, 1996; 75% for October 1, 1997; 60% for October 1, 1998.

§Dollar-adjusted margins were calculated as:  $(\text{sum of all payments to cohort hospitals} - \text{sum of all costs to cohort hospitals}) / (\text{sum of all payments to cohort hospitals})$ .
